# Supplementary figures and images for: A new highly adaptable design of shear-flow device for orientation of macromolecules for Linear Dichroism (LD) measurement
Source: Royal Society of Chemistry journal article supplement (doi:10.1039/c0an00455c), 2011-01-01

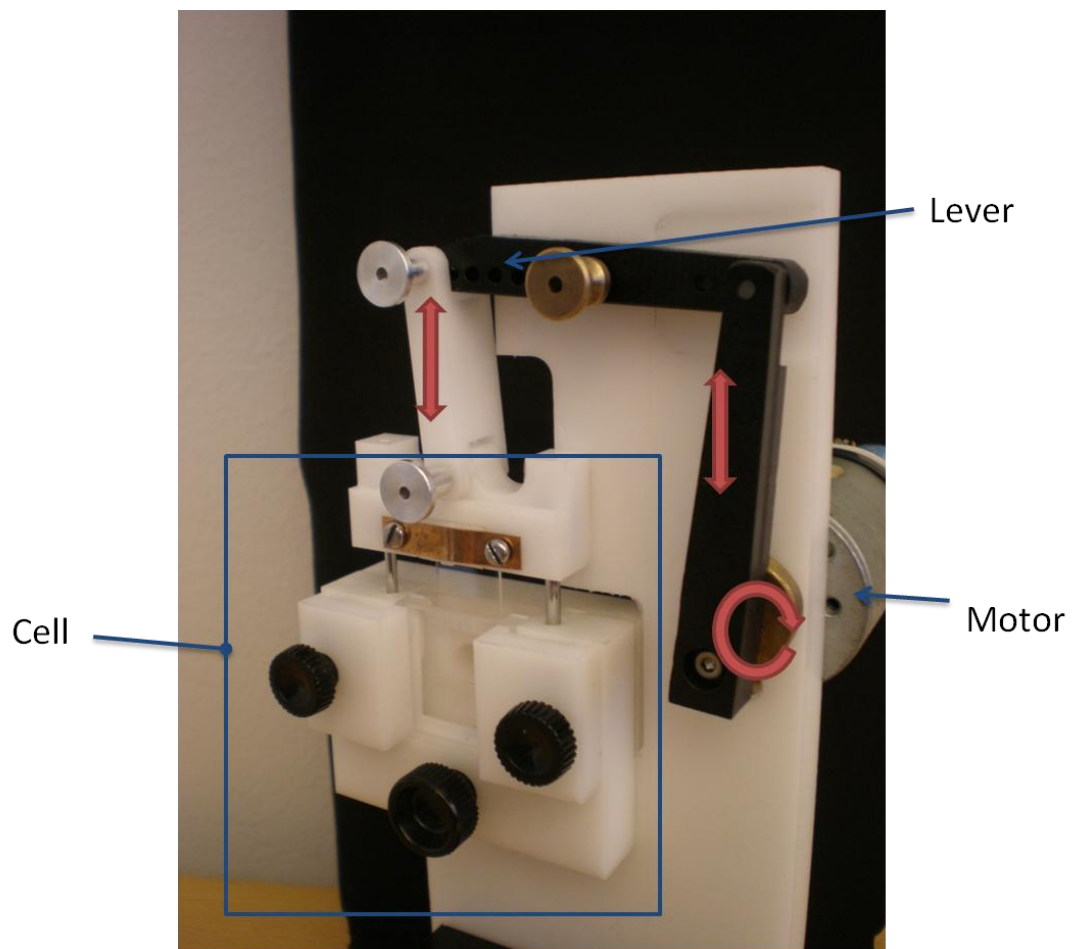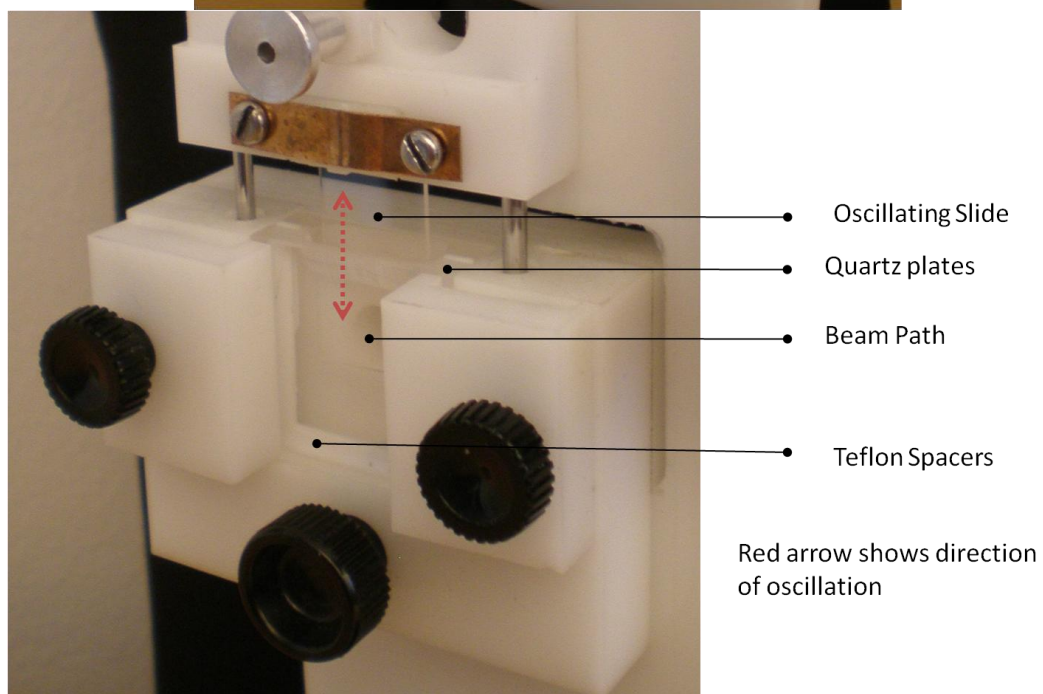

Supplement: c0an00455c.pdf [file c0an00455c.pdf]
